# Supplementary material for: Using electrochemistry for metabolite simulation and synthesis in preventive doping research: application to the Rycal S107 and the PPARδ-agonist GW1516
Source: Royal Society of Chemistry journal article supplement (doi:10.1039/c2ay00030j), 2013-01-01
Supplement: c2ay00030j.pdf [file c2ay00030j.pdf]

## Supplementary Information

### Using Electrochemistry for Metabolite Simulation and Synthesis in Preventive Doping Research: Application to the Rycal S107 and the PPAR $\delta$ -agonist GW1516

Sandra Jahn<sup>a</sup>, Simon Beuck<sup>b</sup>, Ines Möller<sup>b</sup>, Mario Thevis<sup>b</sup> and Uwe Karst<sup>\*a</sup>

<sup>a</sup>University of Münster, Institute of Inorganic and Analytical Chemistry and NRW  
Graduate School of Chemistry, Corrensstr. 30, 48149 Münster, Germany

<sup>b</sup>German Sport University Cologne, Institute of Biochemistry, Center for Preventive  
Doping Research, Am Sportpark Müngersdorf 6, 50933 Cologne

## Abstract (Supplementary Information)

Biotransformation of the two potential doping agents S107 and GW1516 was simulated in an electrochemical (EC) cell and compared to results from *in vitro* experiments. Supplementary to the article, details on experimental conditions, instrumental setups and product ion spectra are given (or discussed) in the following.

## Experimental (Supplementary Information)

In support of the “Experimental” section in the article, Tables S-1 through S-9 provide the different LC separation and ESI-MS conditions used during the studies with (D<sub>3</sub>-)S107 and GW1516.

### LC Separation Conditions

#### Studies with (D<sub>3</sub>-)S107

**Table S-1:** LC gradient profile applied for all (EC)/LC/ESI-MS analyses of S107 and its stable isotope-labeled analog D<sub>3</sub>-S107 (in combination with column 1 and solvent composition 1)\*.

|                  |     |     |     |     |       |     |       |     |
|------------------|-----|-----|-----|-----|-------|-----|-------|-----|
| Time [min]       | 0   | 10  | 11  | 12  | 12.01 | 16  | 16.01 | 18  |
| Acetonitrile [%] | 2   | 70  | 100 | 100 | 2     | 2   | 2     | 2   |
| Flow Rate [μL]   | 300 | 300 | 300 | 300 | 400   | 400 | 300   | 300 |

#### Studies with GW1516

**Table S-2:** LC gradient profile employed for (EC)/LC/ESI-QqLIT-MS and (EC)/LC/ESI-Orbitrap-MS analyses of GW1516 (in combination with column 1 and solvent composition 1)\*.

|                  |     |     |     |     |       |     |
|------------------|-----|-----|-----|-----|-------|-----|
| Time [min]       | 0   | 8   | 10  | 12  | 12.01 | 18  |
| Acetonitrile [%] | 30  | 80  | 100 | 100 | 30    | 30  |
| Flow Rate [μL]   | 300 | 300 | 300 | 300 | 300   | 300 |

**Table S-3:** LC gradient profile used for (EC)/LC/ESI-QTOF-MS analyses of GW1516 (in combination with column 2 and solvent composition 2)\*\*.

|                  |     |     |     |     |       |     |
|------------------|-----|-----|-----|-----|-------|-----|
| Time [min]       | 0   | 8   | 10  | 12  | 12.01 | 18  |
| Acetonitrile [%] | 30  | 80  | 100 | 100 | 30    | 30  |
| Flow Rate [μL]   | 300 | 300 | 300 | 300 | 300   | 300 |

## General

During all LC separations conducted in this work, the injection volume was 5  $\mu$ L and the column oven temperature was set to 35  $^{\circ}$ C.

*\*Column 1:* Phenomenex Kinetex RP-C<sub>18</sub> analytical column,  
100 mm length x 2.1 mm i. d., 2.6  $\mu$ m particle size  
(Aschaffenburg, Germany)

*\*\*Column 2:* Thermo Scientific Hypersil Gold column,  
50 mm length x 2.1 mm i. d., 1.9  $\mu$ m particle size  
(Bremen, Germany)

*\*Solvent Composition 1:* A 5 mM NH<sub>4</sub>OAc buffer  
(adjusted to pH 3.5 with 0.1% HOAc)

B ACN

*\*\*Solvent Composition 2:* A 0.1% FA  
B ACN

## ESI-MS Conditions

### micrOTOF – EC/ESI-TOF-MS Studies (“Mass Voltammograms”, On-Line)

**Table S-4:** ESI-TOF-MS conditions applied for the generation of mass voltammograms of S107. Detection was carried out in positive ionization mode within a range of  $m/z$  50 – 1000.

| ESI-TOF-MS Parameters (S107)      |        |                              |      |
|-----------------------------------|--------|------------------------------|------|
| End Plate Offset [V]              | – 400  | Hexapole 1 [V]               | 25.7 |
| Capillary [V]                     | – 4000 | Hexapole 2 [V]               | 20.3 |
| Nebulizer (N <sub>2</sub> ) [bar] | 0.8    | Hexapole RF [Vpp]            | 90   |
| Dry Gas (N <sub>2</sub> ) [L/min] | 6.0    | Transfer Time                | 49   |
| Dry Temperature [ $^{\circ}$ C]   | 180    | Pre Pulse Storage [ $\mu$ s] | 1    |
| Capillary Exit [V]                | 120    | Lens 1 Storage [V]           | 30   |
| Skimmer 1 [V]                     | 40     | Lens 1 Extraction [V]        | 20.6 |
| Skimmer 2 [V]                     | 23.6   | Detector [V]                 | 0    |

For GW1516, the same conditions were used, except for the parameters listed in the subsequent Table S-5.

**Table S-5:** Selected ESI-TOF-MS parameters (differing from those in Table S-4) for the generation of mass voltammograms of GW1516. Detection was carried out in positive ionization mode within a range of  $m/z$  50 – 1000.

| ESI-TOF-MS Parameters (GW1516) |      |                       |      |
|--------------------------------|------|-----------------------|------|
| Capillary Exit [V]             | 90   | Hexapole 1 [V]        | 26.7 |
| Skimmer 1 [V]                  | 30   | Hexapole 2 [V]        | 20.6 |
| Skimmer 2 [V]                  | 24.6 | Lens 1 Extraction [V] | 20.9 |

Measurements of each mass voltammogram were recorded in triplicate for both substances to ensure reproducibility of the results. Internal calibration was accomplished using sodium formate clusters leading to mass accuracies < 5 ppm.

#### API 2000 QTRAP – (EC, In Vitro)/LC/ESI-QqLIT-MS Studies (On-, Off-Line)

Screening for metabolites was carried out using positive ionization and full scan mode (EMS mode) in a range of  $m/z$  100 – 400 for S107 and D<sub>3</sub>-S107 or of  $m/z$  100 – 600 for GW1516. For fragmentation, enhanced product ion spectra (EPI mode) were recorded.

**Table S-6:** Summary of ESI(+)-QqLIT-MS conditions employed during this project. EMS: enhanced MS (full scan), EPI: enhanced product ion scan.

| ESI-QqLIT-MS Parameters                    | EMS Mode               |        | EPI Mode |
|--------------------------------------------|------------------------|--------|----------|
|                                            | (D <sub>3</sub> -)S107 | GW1516 | all      |
| Ionization Spray Voltage [V]               | 4500                   | 4500   | 4500     |
| Source Temperature [°C]                    | 350                    | 350    | 350      |
| Curtain Gas (N <sub>2</sub> ) [psi]        | 25                     | 25     | 25       |
| Nebulizer Gas (N <sub>2</sub> ) [psi]      | 60                     | 60     | 60       |
| Drying Gas [psi]                           | 30                     | 30     | 30       |
| Entrance Potential (EP) [V]                | 10                     | 10     | 10       |
| Collision-Activated Dissociation (CAD) Gas | "High"                 | "High" | "High"   |
| Declustering Potential (DP) [V]            | 70                     | 20     | 20       |
| Collision Energy (CE) [V]                  | 10                     | 5      | 25       |

Additionally, EMS and EPI experiments were performed in negative ionization mode for GW1516 while applying the same conditions as described above, albeit with reversed polarity. Nitrogen gas ( $5 \times 10^{-3}$  Pa) was delivered by a nitrogen generator (CMC Instruments, Eschborn, Germany).

#### Exactive – EC/LC/ESI-Orbitrap-MS Studies (Off-Line)

For studies with GW1516, the Exactive was operated either in positive or in negative ionization mode and calibrated using the manufacturer's calibration mixture (yielding a total of seven reference masses). Mass accuracies better than 5 ppm in both ionization modes were achieved throughout the study. S107 and D<sub>3</sub>-S107 were analyzed in positive ionization mode only. The same parameters were applied for all three substances as presented in Tables S-7 and S-8.

**Table S-7:** General ESI-Orbitrap-MS conditions applied for off-line analyses of (D<sub>3</sub>-)S107 and GW1516 in this work.

| Orbitrap-MS Parameters                        | ESI(+) | ESI(-) |
|-----------------------------------------------|--------|--------|
| Ionization Spray Voltage [V]                  | 5500   | – 4500 |
| Capillary Temperature [°C]                    | 275    | 275    |
| Sheath Gas Flow Rate (N <sub>2</sub> ) [a.u.] | 20     | 20     |
| Aux Gas Flow Rate (N <sub>2</sub> ) [a.u.]    | 2      | 2      |
| Capillary Voltage [V]                         | 50     | – 25   |
| Tube Lens Voltage [V]                         | 150    | – 100  |
| Skimmer Voltage [V]                           | 20     | – 20   |

**Table S-8:** Summary of different ESI-Orbitrap-MS settings employed during off-line analyses with (D<sub>3</sub>-)S107 and GW1516. FWHM: full width at half maximum, HCD: higher-energy collision-induced dissociation.

| Setting | <i>m/z</i> Range | Resolution [FWHM] | HCD Scan [V] |
|---------|------------------|-------------------|--------------|
| a)      | 100 – 1500       | 50'000            | –            |
| b)      | 90 – 1000        | 25'000            | 25           |
| c)      | 70 – 550         | 25'000            | 50           |

Nitrogen gas ( $5 \times 10^{-3}$  Pa) was delivered by a nitrogen generator (CMC Instruments, Eschborn, Germany).

#### TripleTOF – (EC, In Vitro)/LC/ESI-QTOF-MS Studies (Off-Line)

A more detailed investigation of GW1516 samples on the QTOF mass spectrometer was carried out using the positive ionization mode only. Before sample injection, mass calibration was achieved by post-column T-split infusion of the AB Sciex APCI positive calibration solution using the external calibrant delivery system. Metabolite screening was conducted in full scan mode (range of  $m/z$  100 – 1100), while further characterization was achieved via MS/MS experiments of selected precursor ions.

**Table S-9:** ESI(+)-QTOF-MS conditions used for studies with GW1516. EMS: enhanced MS (full scan), EPI: enhanced product ion scan.

| ESI-QTOF-MS Parameters                | EMS Mode | EPI Mode |
|---------------------------------------|----------|----------|
| Ionization Spray Voltage [V]          | 5500     | 5500     |
| Source Temperature [°C]               | 500      | 500      |
| Curtain Gas (N <sub>2</sub> ) [psi]   | 25       | 25       |
| Nebulizer Gas (N <sub>2</sub> ) [psi] | 50       | 50       |
| Drying Gas [psi]                      | 70       | 70       |
| Declustering Potential (DP) [V]       | 80       | 80       |
| Collision Energy (CE) [V]             | 10       | 35       |

Nitrogen gas ( $5 \times 10^{-3}$  Pa) was delivered by a nitrogen generator (CMC Instruments, Eschborn, Germany).

## Results and Discussion (Supplementary Information)

Supplementary to the “Results and Discussion” section in the article, instrumental setups used in this work (Figure S-1) and selected ESI-MS/MS spectra (Figures S-2 through S-5) are illustrated in the following for an improved understanding of the text. Product ion spectra will be presented for S107 (Figure S-2) and GW1516 (Figure S-3) as well as for their EC-generated oxidation products S1d, S1e, S2 and S4 (Figure S-4) or G2d and G2e (Figure S-5), respectively. Moreover, the structural discussion of the two mono-oxygenated metabolite isomers S1b and S1c is provided.

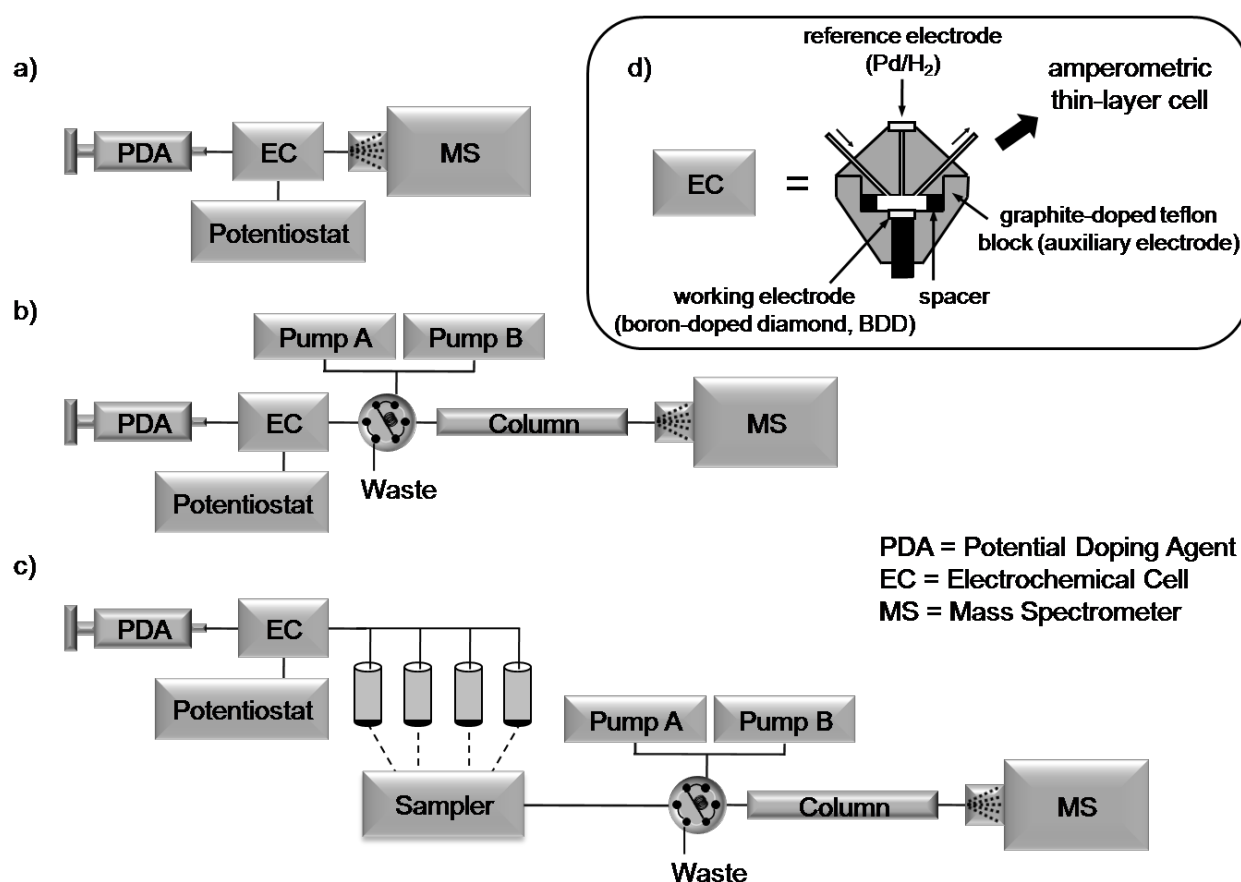

**Figure S-1:** The three different instrumental setups that were employed during this study are shown including the coupling of a) on-line EC/ESI-MS, b) on-line EC/LC/ESI-MS and c) off-line EC/LC/ESI-MS. Geometry and technical details of the amperometric thin-layer cell itself are schematically depicted in part d).

147 **S107**

148

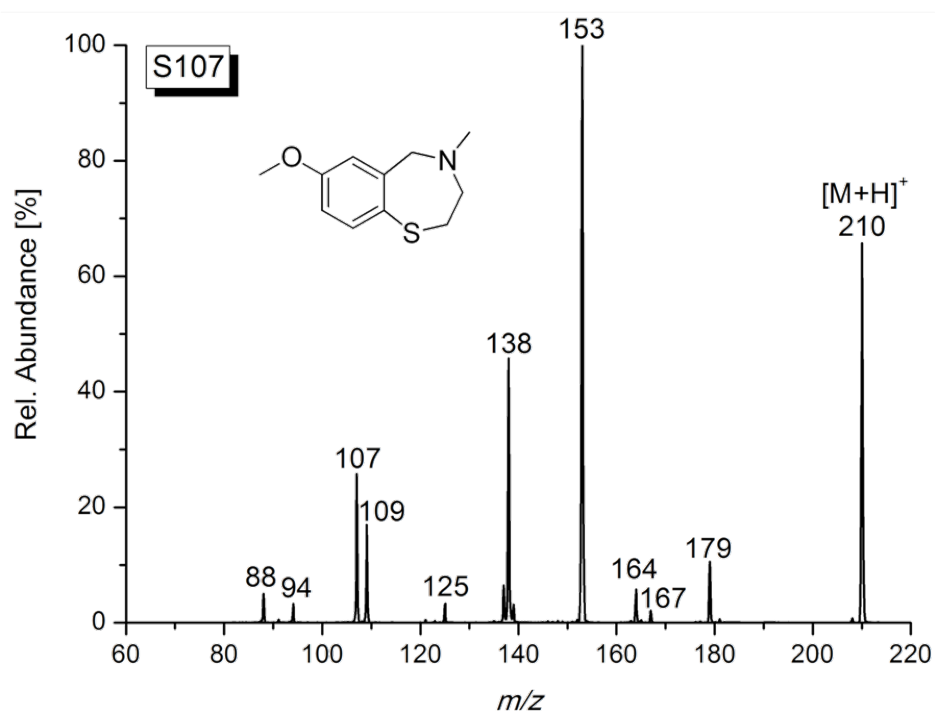

149

150 **Figure S-2:** ESI-MS/MS spectrum of the  $[M+H]^+$  ion of "Rycal" S107 recorded on a QqLIT-  
151 MS instrument (QTRAP, Applied Biosystems, Darmstadt, Germany).

152

153 Figure S-2 is in accordance with data from Thevis et al. (cf. ESI product ion spectra in  
154 reference 8 [M. Thevis, S. Beuck, A. Thomas, M. Kohler, N. Schlörer, I. Vajjala and W.  
155 Schänzer, *Drug Test. Anal.*, 2009, **1**, 32-42] and reference 10 [M. Thevis, S. Beuck, A.  
156 Thomas, B. Kortner, M. Kohler, G. Rodchenkov, W. Schänzer, *Rapid Commun. Mass*  
157 *Spectrom.* 2009, **23**, 1139-1146]).

158

159



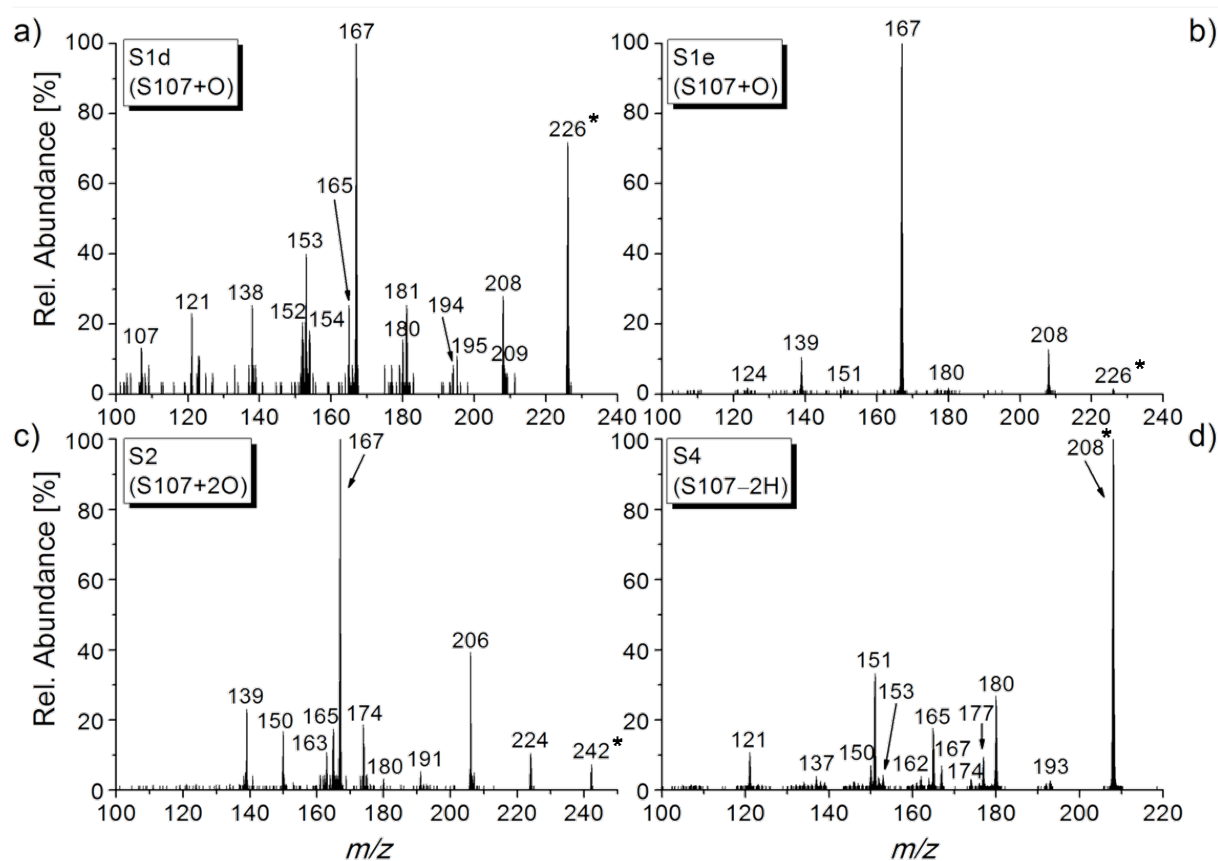

**Figure S-3:** EPI mass spectra of selected, EC-generated metabolites of S107 (acquired via LC/ESI-MS/MS analysis on an API 2000 QTRAP mass spectrometer in the positive ionization mode): a) mono-oxygenated isomer S1d (*N*-oxide), b) mono-oxygenated isomer S1e (benzylic hydroxylation), c) bis-oxygenated product S2, d) dehydrogenated product S4.  $[M+H]^+$  ions of the parent compounds are marked with an asterisk.

## Structural discussion of mono-oxygenated metabolite isomers S1b and S1c

In the MS<sup>2</sup> spectrum of S1b (cf. Table 3 in the article, data not shown), a main product ion was detected at  $m/z$  169 which possibly corresponds to an oxygenated type of the characteristic S107 fragment at  $m/z$  153. As the latter consists of a 3-methoxytoluene moiety still carrying the sulfur atom<sup>8</sup>, the presence of a metabolite that was hydroxylated at the aromatic ring of the 1,4-benzothiazepine-based structure, is supported. Besides,  $m/z$  153 was no longer detected. For S1c, however, collision-induced dissociation (CID) led to the typical fragments  $m/z$  153 and  $m/z$  138, hence, rendering aromatic hydroxylation at another C-atom unlikely. Next to the loss of water ( $m/z$  208), major signals were found at  $m/z$  164,  $m/z$  166, and  $m/z$  180 in this case. Since these ions all have an even electron configuration, the nitrogen atom should still be present in the molecule according to the nitrogen rule (considering non-radical species). MS<sup>2</sup> experiments with the corresponding oxygenated D<sub>3</sub>-S107 isomer unveil the generation of product ions at  $m/z$  167,  $m/z$  169 and  $m/z$  183, indicating retention of the deuterated *N*-methyl group as well. Thus, it is proposed that these species are produced as a result of rearrangement processes in the seven-membered thiazepine ring, following the formal loss of CH<sub>2</sub>SO (62 u,  $m/z$  164), C<sub>3</sub>H<sub>8</sub>O (60 u,  $m/z$  166), and C<sub>2</sub>H<sub>6</sub>O (46 u,  $m/z$  180), respectively. This leads to the conclusion of S1c being most probably hydroxylated at one of the two saturated carbon atoms which are located between the sulfur (S-1) and the nitrogen (N-4) position of the 1,4-benzothiazepine framework (cf. Figure 4 in the article).

**GW1516**

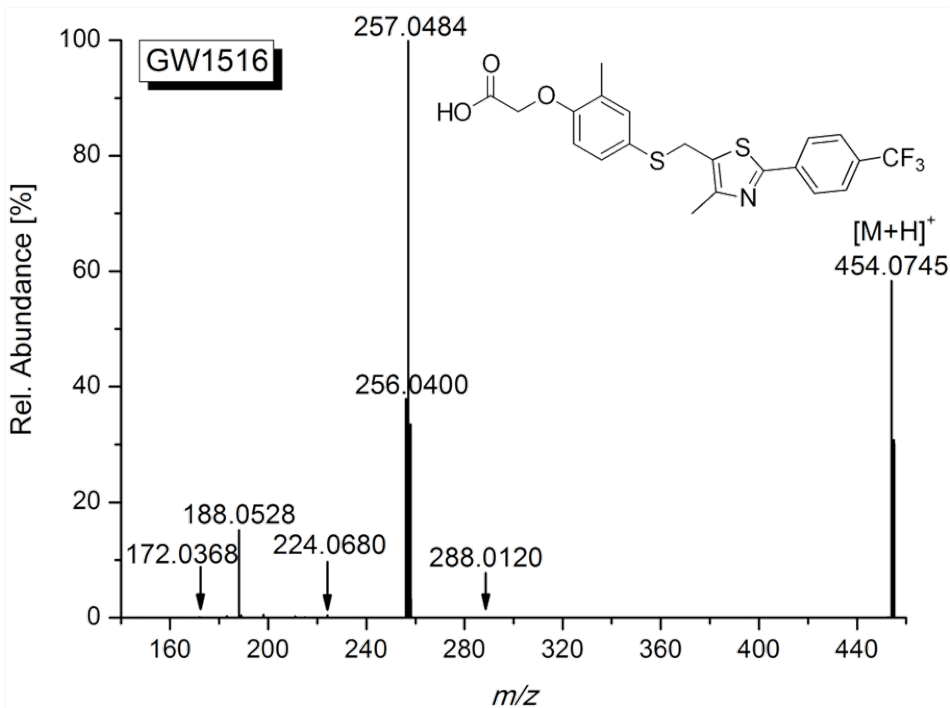

**Figure S-4:** ESI product ion spectrum of the  $[M+H]^+$  ion of PPAR $\delta$  agonist GW1516 recorded on a QTOF mass spectrometer (TripleTOF™ 5600, Applied Biosystems, Darmstadt, Germany).

Figure S-4 is in agreement with data from Thevis et al. (cf. ESI-MS/MS spectrum in reference 10 [M. Thevis, S. Beuck, A. Thomas, B. Kortner, M. Kohler, G. Rodchenkov, W. Schänzer, *Rapid Commun. Mass Spectrom.* 2009, **23**, 1139-1146]).

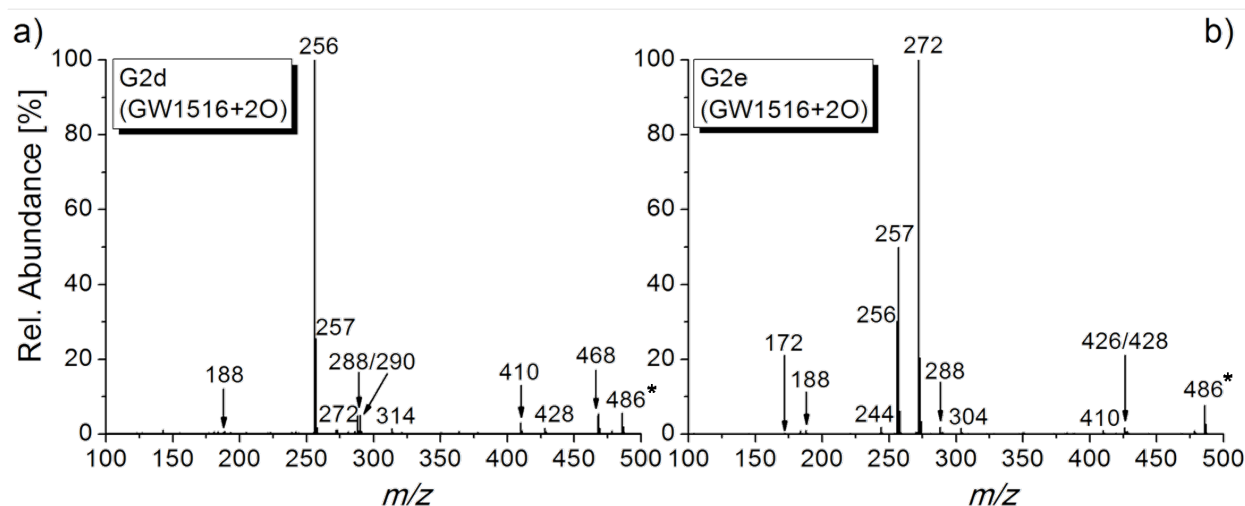

**Figure S-5:** EPI mass spectra of the  $[M+H]^+$  ions (marked with an asterisk) of two isomeric, bis-oxygenated GW1516 metabolites, generated off-line in the EC cell and recorded on a TripleTOF<sup>TM</sup> 5600 mass spectrometer after LC separation: a) isomer G2d (hydroxylated and S-oxidized thiophenol residue), b) isomer G2e (duplicate S-oxide).
